# Supplementary material for: A Novel Rat Model of Embolic Cerebral Ischemia Using a Microcatheter and Zirconia Ball Under Fluoroscopic Guidance
Source: Research Square preprint supplement (doi:10.21203/rs.3.rs-264121/v1), 2021-03-11
Supplement: Supplementary file 1 [file 42ab60ea0b4db01c6815f53a.docx]

**Supplementary Video 1**

After the catheter was guided to the left internal carotid artery, one zirconia ball of 0.4 mm in diameter was advanced in the catheter by a slow injection of heparinized physiological saline, and the anterior cerebral artery–middle cerebral artery bifurcation was selectively embolized (left anterior oblique angle = 80°).

**Supplementary Video 2**

In the frontal view, after the catheter was guided to the left internal carotid artery, one zirconia ball of 0.4 mm in diameter was advanced in the catheter by a slow injection of heparinized physiological saline. The zirconia ball flowed into the middle cerebral artery origin, but then accidentally flowed back into the left posterior communicating artery.
